# Supplementary material
Source: PubMed Central journal article supplement (PMC3963415)
Supplement: supp_WNL.0000000000000128_Figure_e-1.pdf [file supp_WNL.0000000000000128_Figure_e-1.pdf]

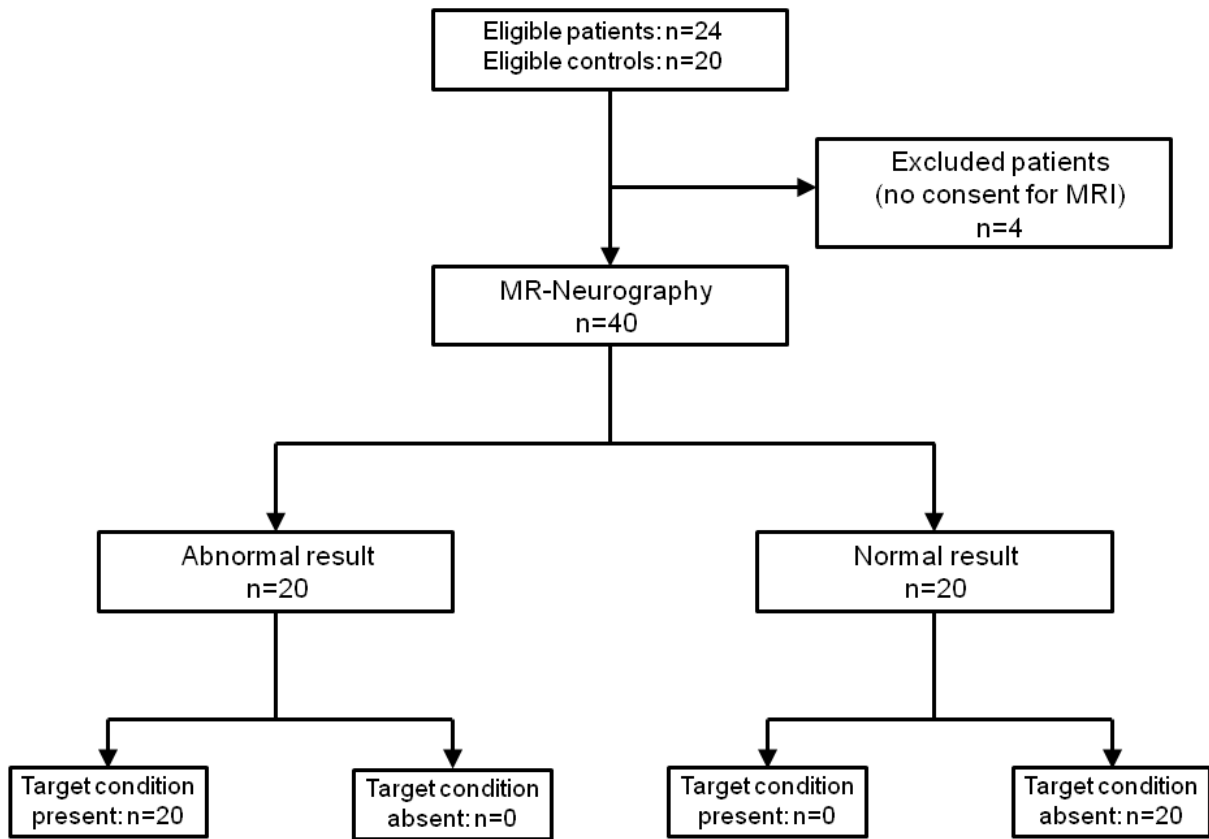

**Figure e-1. Flow diagram of patients and controls undergoing MR-Neurography as the diagnostic test under investigation.** Visualization is in accordance with Standards for the Reporting of Diagnostic accuracy studies (STARD).
